# Supplementary material for: Landscape genetics of the copal tree, Bursera cuneata (Burseraceae): The key role of the Tropical Dry Forest in shaping connectivity at the regional scale
Source: Research Square preprint supplement (doi:10.21203/rs.3.rs-7724981/v1), 2025-11-06

**SUPPLEMENTARY DATA**

Table S1. Pairwise population differentiation using the fixation index (FST) per basin. Confidence intervals within parentheses

|  | CHA | PTZ | CTZ | BAL |
| --- | --- | --- | --- | --- |
| PTZ | 0.2676  (0.1771-0.3235) |  |  |  |
| CTZ | 0.2606  (0.1505-0.3201) | 0.1639  (0.1398-0.1836) |  |  |
| BAL | 0.3328  (0.2397-0.4797) | 0.0465  (0.0436-0.0494) | 0.2659  (0.3141-0.3635) |  |
| MEX | 0.4053  (0.3435-0.5720) | 0.3498  (0.2991-0.4501) | 0.3285  (0.2724-0.3576) | 0.3646  (0.3413-0.4445) |

Table S2.Migration rates between the five hydrological basins in *Bursera cuneta*. Numbers in parenthesis denote 95% confidence intervals.

|  | **Donor group** | | | |  |
| --- | --- | --- | --- | --- | --- |
| **Recipient group** | **CHA** | **PTZ** | **CTZ** | **BAL** | **MEX** |
| **CHA** | 0.6842 (0.0167) | 0.1115 (0.0687) | 0.1486 (0.0698) | 0.0345 (0.0296) | 0.0212 (0.0201) |
| **PTZ** | 0.0977 (0.0209) | 0.8277 (0.0245) | 0.0323 (0.0192) | 0.0207 (0.0122) | 0.0215 (0.0146) |
| **CTZ** | 0.0592 (0.0205) | 0.0680 (0.0495) | 0.8008 (0.0478) | 0.0353 (0.0166) | 0.0367 (0.0161) |
| **BAL** | 0.0875 (0.0334) | 0.0680 (0.0408) | 0.0447 (0.0343) | 0.7530 (0.0301) | 0.0468 (0.0319) |
| **MEX** | 0.0461 (0.0405) | 0.0918 (0.0623) | 0.1374 (0.0673) | 0.0347 (0.0318) | 0.6900 (0.0218) |

Table S3. *Cohen’s D* values, 95% of confidence intervals, *p values*, and effect size direction of the three combined gravity models: comb1) Geo + TDF + Niche; comb2) Geo + TDF + TF; and comb3) Geo + TDF + TF + Niche + Rough. * *P* < 0.05, ** *P* < 0.005

| **Scale (m)** | **1000** | | | | **2000** | | | | | **3000** | | | | | **4000** | | | | | **5000** | | | | | |
| --- | --- | --- | --- | --- | --- | --- | --- | --- | --- | --- | --- | --- | --- | --- | --- | --- | --- | --- | --- | --- | --- | --- | --- | --- | --- |
| Combined Models | Cohen's D | Lower CI | Upper CI | P-value | Cohen's D | Lower CI | Upper CI | P value | Cohen's D | | Lower CI | Upper CI | P value | Cohen's D | | Lower CI | Upper CI | P value | Cohen's D | | Lower CI | Upper CI | P value | Effect size direction |
| **Comb1:** |  |  |  |  |  |  |  |  |  | |  |  |  |  | |  |  |  |  | |  |  |  |  |
| TDF | 0.293 | 0.206 | 0.380 | 0.000** | 0.260 | 0.173 | 0.347 | 0.000** | 0.410 | | 0.322 | 0.497 | 0.000** | 0.454 | | 0.366 | 0.542 | 0.000** | 0.528 | | 0.440 | 0.617 | 0.000** | (+) |
| Niche | 0.100 | 0.013 | 0.187 | 0.110 | 0.136 | 0.049 | 0.223 | 0.03* | 0.161 | | 0.074 | 0.248 | 0.010** | 0.089 | | 0.002 | 0.175 | 0.157 | 0.104 | | 0.017 | 0.191 | 0.097 | (+) |
| **Comb2:** |  |  |  |  |  |  |  |  |  | |  |  |  |  | |  |  |  |  | |  |  |  |  |
| TDF | 0.261 | 0.174 | 0.348 | 0.000** | 0.240 | 0.152 | 0.327 | 0.001** | 0.386 | | 0.298 | 0.473 | 0.000** | 0.448 | | 0.360 | 0.535 | 0.000** | **0.541** | | **0.453** | **0.630** | **0.000**** | (+) |
| TF | -0.262 | -0.349 | -0.175 | 0.000 | -0.287 | -0.374 | -0.199 | 0.000** | -0.294 | | -0.381 | -0.207 | 0.000** | -0.318 | | -0.405 | -0.230 | 0.000** | **-0.329** | | **-0.417** | **-0.242** | **0.000**** | (-) |
| **Comb3:** |  |  |  |  |  |  |  |  |  | |  |  |  |  | |  |  |  |  | |  |  |  |  |
| TDF | 0.257 | 0.169 | 0.344 | 0.000** | 0.226 | 0.139 | 0.314 | 0.000** | **0.377** | | **0.289** | **0.464** | **0.000**** | **0.403** | | **0.315** | **0.491** | 0.000** | 0.479 | | 0.391 | 0.567 | 0.000** | (+) |
| TF | -0.159 | -0.246 | -0.072 | 0.012* | -0.159 | -0.246 | -0.072 | 0.011* | **-0.141** | | **-0.228** | **-0.054** | **0.024*** | **-0.206** | | **-0.293** | **-0.119** | 0.001** | -0.226 | | -0.313 | -0.139 | 0.000** | (-) |
| Niche | 0.093 | 0.006 | 0.180 | 0.137 | 0.091 | 0.004 | 0.178 | 0.146 | **0.111** | | **0.023** | **0.197** | **0.079** | **0.029** | | **-0.057** | **0.116** | 0.637 | 0.036 | | -0.051 | 0.123 | 0.565 | (+) |
| Rough | 0.472 | 0.383 | 0.560 | 0.000** | 0.453 | 0.365 | 0.542 | 0.000* | **0.443** | | **0.355** | **0.531** | **0.000*** | **0.371** | | **0.284** | **0.459** | 0.000** | 0.272 | | 0.184 | 0.360 | 0.000** | (+) |

Figure S4


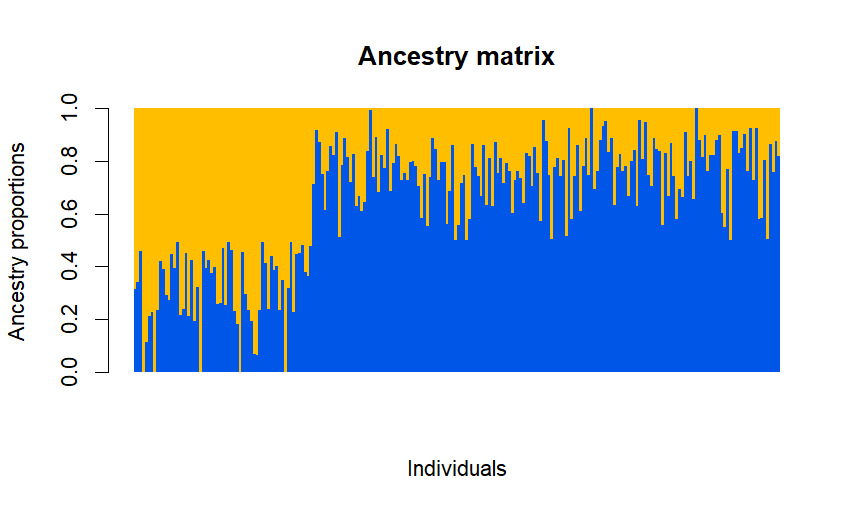

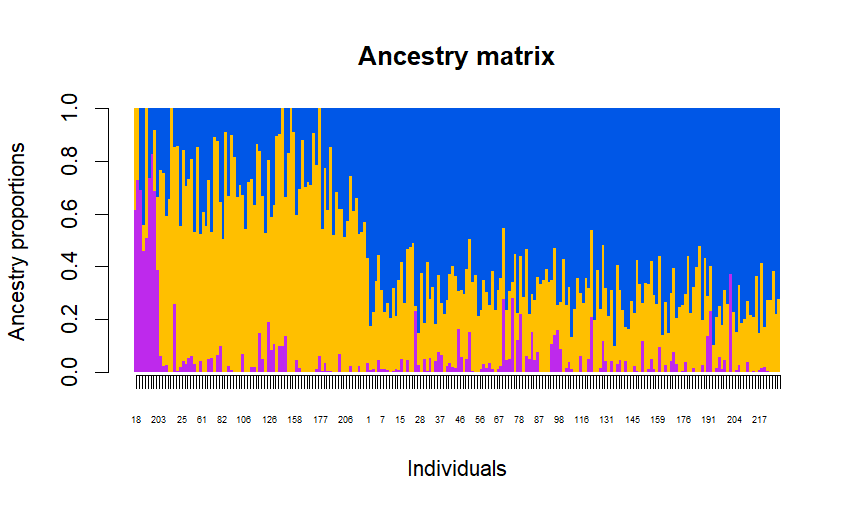

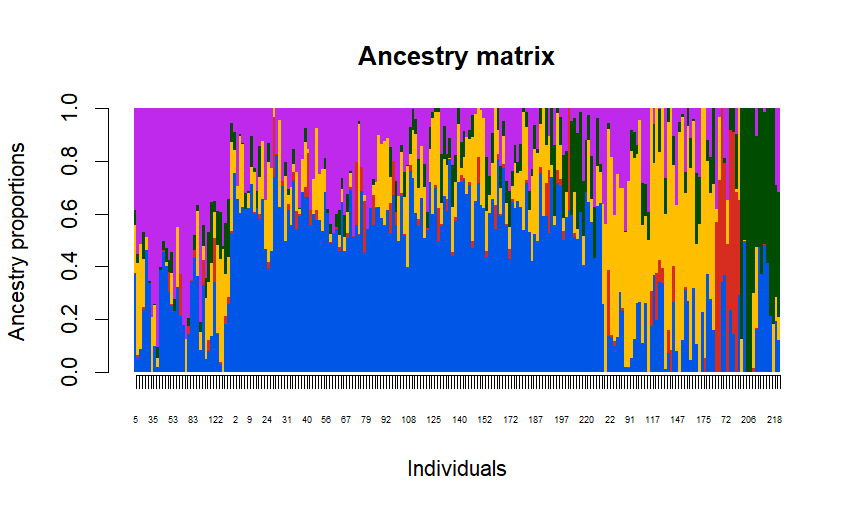

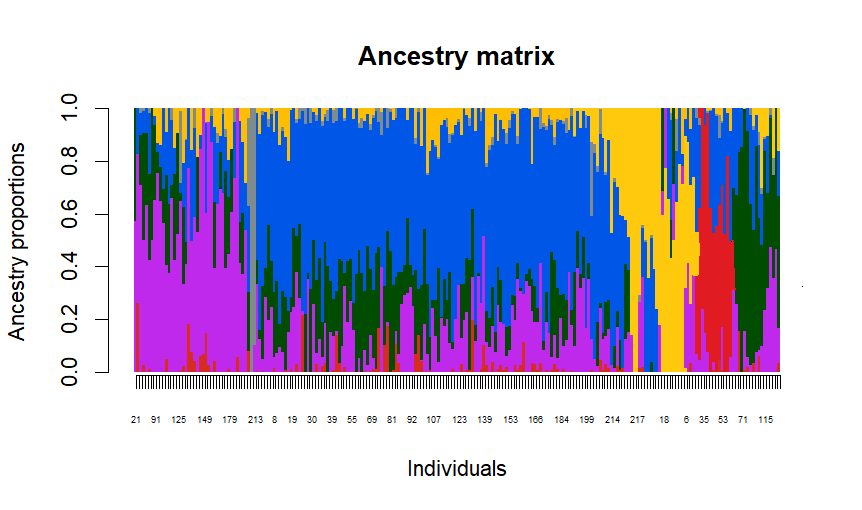


CHA

PTZ

CTZ

BAL

MEX


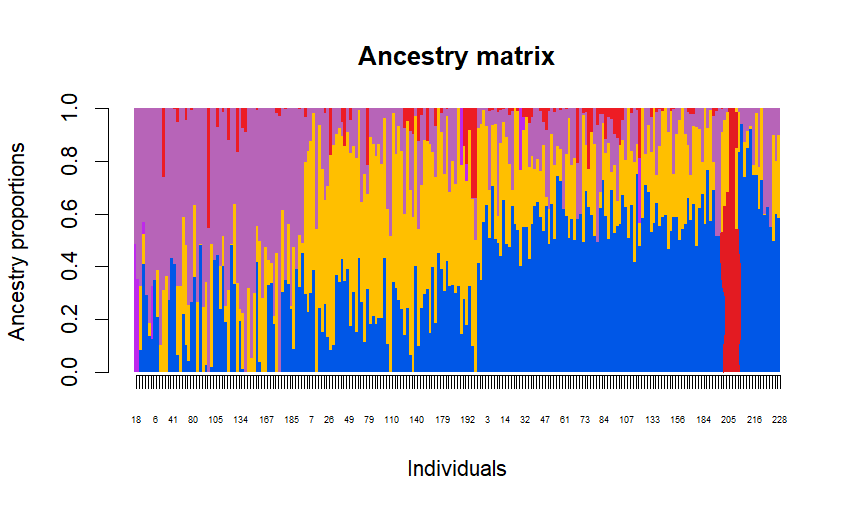


K = 3

K = 4

K = 5

K = 6

K = 2

Figure S5


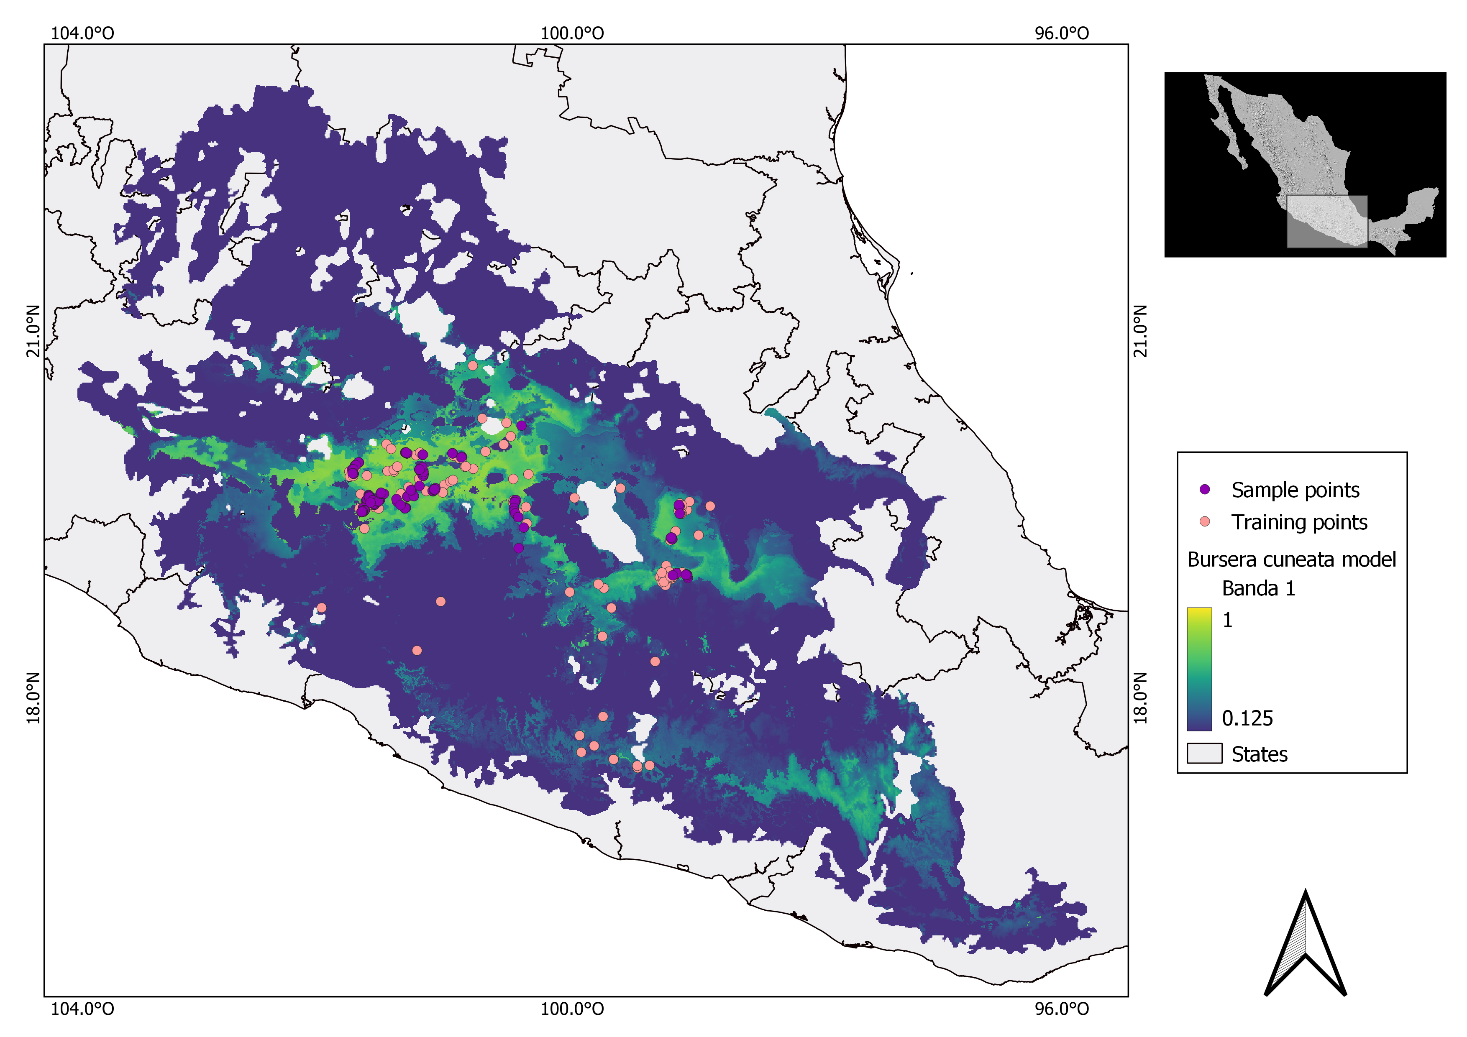

Supplement: Supplementary file 1 [file cdc3b8af297951c2e25853b4.docx]
